# Supplementary material for: Genome Survey Sequencing for the Characterization of the Genetic Background of Rosa roxburghii Tratt and Leaf Ascorbate Metabolism Genes
Source: PLoS One. 2016 Feb 5;11(2):e0147530. doi: 10.1371/journal.pone.0147530 (PMC4743950; doi:10.1371/journal.pone.0147530)
Supplement: S3 Table — (XLS) [file pone.0147530.s005.xls]

## Sheet: Sheet1
S3 Table Occurrence of SSR motifs in Genome Survey to Rosa roxburghii.
SSR Motif	Number of repeats													total
	4	5	6	7	8	9	10	11	12	13	14	15	>=16
G/C	0	0	0	0	0	0	808	715	423	328	289	275	1162	4000
A/T	0	0	0	0	0	0	36256	19870	13905	9600	7368	5858	14435	107292
AG/CT	0	0	2809	1920	1565	1178	832	688	504	460	357	322	1779	12414
AT/AT	0	0	1765	1146	871	735	532	414	240	167	64	22	4	5960
CA/TG	0	0	893	637	467	395	276	196	138	123	81	71	330	3607
CG/CG	0	0	25	10	3	2	0	0	0	0	0	0	0	40
GA/TC	0	0	2486	1783	1425	1196	868	619	488	430	339	292	2013	11939
GC/GC	0	0	35	15	11	1	0	0	0	0	0	0	0	62
GT/AC	0	0	956	673	502	440	324	202	158	129	78	84	329	3875
TA/TA	0	0	1655	1118	814	576	396	300	167	94	49	14	3	5186
AAC/GTT	0	144	69	32	12	7	1	0	1	0	0	0	3	269
AAG/CTT	0	601	281	178	97	60	42	27	9	10	6	2	9	1322
ACA/TGT	0	110	36	22	5	3	2	1	0	0	0	0	1	180
ACT/AGT	0	38	5	8	1	2	0	1	0	1	0	0	0	56
AGG/CCT	0	123	70	29	11	18	1	0	0	0	0	0	0	252
ATT/AAT	0	606	387	192	117	54	38	29	14	17	17	13	27	1511
CAC/GTG	0	121	49	18	13	4	1	0	0	0	0	0	0	206
CAT/ATG	0	129	45	15	20	9	2	0	2	0	0	0	1	223
CGA/TCG	0	35	15	1	3	0	0	0	0	0	0	0	0	54
CGG/CCG	0	56	21	4	2	0	0	0	0	0	0	0	0	83
CGT/ACG	0	30	11	4	0	1	1	0	0	0	0	0	0	47
CTA/TAG	0	26	12	3	5	2	0	0	0	0	0	0	0	48
CTG/CAG	0	76	33	7	6	2	0	1	0	0	0	0	0	125
GAA/TTC	0	762	377	221	98	72	40	33	6	11	6	6	14	1646
GAC/GTC	0	51	16	4	2	2	0	0	1	0	0	0	0	76
GAG/CTC	0	191	68	52	21	10	3	1	1	0	0	0	0	347
GAT/ATC	0	156	55	34	20	6	2	2	2	0	0	0	4	281
GCG/CGC	0	25	17	1	1	0	0	0	0	0	0	0	0	44
GCT/AGC	0	84	24	13	1	1	0	1	0	0	0	0	0	124
GGC/GCC	0	59	12	4	2	0	0	0	0	0	0	0	0	77
GGT/ACC	0	95	42	18	4	2	1	0	0	0	0	0	0	162
GTA/TAC	0	25	10	10	3	3	0	1	2	0	0	0	0	54
TAT/ATA	0	151	89	55	33	27	12	12	9	10	5	11	16	430
TCC/GGA	0	161	76	30	17	5	0	0	0	1	0	0	0	290
TCT/AGA	0	628	293	173	91	56	33	16	14	7	6	0	16	1333
TGA/TCA	0	157	57	28	9	2	2	3	2	0	1	1	0	262
TGC/GCA	0	84	29	7	0	1	2	1	0	0	0	0	0	124
TGG/CCA	0	167	55	36	7	4	0	0	0	0	0	0	0	269
TTA/TAA	0	385	200	106	67	43	29	20	16	15	8	6	23	918
TTG/CAA	0	204	72	35	12	5	3	3	0	0	1	0	1	336
ATTT/AAAT	0	302	72	26	3	1	1	0	0	0	0	0	0	405
TAAA/TTTA	0	179	39	18	2	3	3	0	1	0	0	0	0	245
ATAA/TTAT	0	99	24	12	2	1	1	0	1	0	0	0	0	140
AATA/TATT	0	81	22	8	1	0	0	0	0	0	0	0	0	112
GAAA/TTTC	0	41	17	5	2	0	0	0	0	0	0	0	0	65
TATG/CATA	0	24	16	9	6	2	2	0	1	0	0	0	4	64
AAAG/CTTT	0	36	16	3	2	3	0	0	0	0	0	0	0	60
GATG/CATC	0	1	1	0	0	0	0	0	0	0	0	0	0	2
GTAT/ATAC	0	14	10	8	2	5	4	2	1	1	1	1	4	53
AAAC/GTTT	0	33	11	4	2	0	0	0	0	0	0	0	0	50
AAGA/TCTT	0	31	7	1	2	0	3	1	0	0	0	0	0	45
CTCC/GGAG	0	25	8	7	1	1	0	0	0	0	0	0	0	42
TTCT/AGAA	0	19	11	7	1	0	0	0	0	0	0	0	0	38
ATGT/ACAT	0	11	11	5	1	2	1	1	1	0	1	0	3	37
AATG/CATT	0	29	4	2	0	0	0	0	0	0	0	0	0	35
TACA/TGTA	0	15	4	2	1	2	3	2	1	0	0	1	2	33
CCTC/GAGG	0	20	6	2	1	1	1	0	0	0	0	0	0	31
CAAA/TTTG	0	19	5	2	2	0	0	0	0	0	0	0	0	28
TAAT/ATTA	0	17	5	1	1	0	0	0	0	0	0	0	0	24
TTAA/TTAA	0	21	3	0	0	0	0	0	0	0	0	0	0	24
GGGA/TCCC	0	10	7	1	0	2	0	0	0	0	0	0	0	20
CCCT/AGGG	0	11	6	1	0	0	0	0	0	0	0	0	0	18
AGAT/ATCT	0	6	5	2	0	2	0	1	0	0	0	0	0	16
AACA/TGTT	0	11	3	0	0	0	0	0	0	0	0	0	0	14
AATT/AATT	0	13	1	0	0	0	0	0	0	0	0	0	0	14
TATC/GATA	0	9	1	1	3	0	0	0	0	0	0	0	0	14
GCTA/TAGC	0	11	0	1	0	0	0	0	0	0	0	0	0	12
TAGA/TCTA	0	5	1	3	0	1	0	0	0	1	0	0	0	11
ATAG/CTAT	0	4	1	0	3	1	0	0	0	0	0	0	0	9
ATGA/TCAT	0	7	1	1	0	0	0	0	0	0	0	0	0	9
CTAG/CTAG	0	7	2	0	0	0	0	0	0	0	0	0	0	9
AATC/GATT	0	6	2	0	0	0	0	0	0	0	0	0	0	8
TTCA/TGAA	0	6	2	0	0	0	0	0	0	0	0	0	0	8
CTCA/TGAG	0	4	1	1	0	1	0	0	0	0	0	0	0	7
ATTC/GAAT	0	5	1	0	0	0	0	0	0	0	0	0	0	6
TGAT/ATCA	0	4	1	1	0	0	0	0	0	0	0	0	0	6
AAGG/CCTT	0	3	1	1	0	0	0	0	0	0	0	0	0	5
AGAC/GTCT	0	3	1	1	0	0	0	0	0	0	0	0	0	5
CACT/AGTG	0	4	0	1	0	0	0	0	0	0	0	0	0	5
TTGT/ACAA	0	4	1	0	0	0	0	0	0	0	0	0	0	5
CATG/CATG	0	3	0	1	0	0	0	0	0	0	0	0	0	4
ATGC/GCAT	0	2	1	0	0	0	0	0	0	0	0	0	0	3
ATGG/CCAT	0	3	0	0	0	0	0	0	0	0	0	0	0	3
GAGT/ACTC	0	2	1	0	0	1	0	0	0	0	0	0	0	4
GTGA/TCAC	0	2	1	1	0	0	0	0	0	0	0	0	0	4
AACT/AGTT	0	1	1	0	1	0	0	0	0	0	0	0	0	3
ATTG/CAAT	0	3	0	0	0	0	0	0	0	0	0	0	0	3
GACA/TGTC	0	2	0	0	1	0	0	0	0	0	0	0	0	3
GGAA/TTCC	0	2	1	0	0	0	0	0	0	0	0	0	0	3
GGAT/ATCC	0	3	0	0	0	0	0	0	0	0	0	0	0	3
TGCA/TGCA	0	3	0	0	0	0	0	0	0	0	0	0	0	3
TTGA/TCAA	0	2	1	0	0	0	0	0	0	0	0	0	0	3
TTGC/GCAA	0	2	1	0	0	0	0	0	0	0	0	0	0	3
AGCT/AGCT	0	2	0	0	0	0	0	0	0	0	0	0	0	2
CAAG/CTTG	0	1	1	0	0	0	0	0	0	0	0	0	0	2
CTTC/GAAG	0	1	1	0	0	0	0	0	0	0	0	0	0	2
GGTT/AACC	0	2	0	0	0	0	0	0	0	0	0	0	0	2
GTTA/TAAC	0	2	0	0	0	0	0	0	0	0	0	0	0	2
GTTG/CAAC	0	1	1	0	0	0	0	0	0	0	0	0	0	2
TACG/CGTA	0	2	0	0	0	0	0	0	0	0	0	0	0	2
TGGG/CCCA	0	2	0	0	0	0	0	0	0	0	0	0	0	2
ACCG/CGGT	0	1	0	0	0	0	0	0	0	0	0	0	0	1
AGGA/TCCT	0	0	1	0	0	0	0	0	0	0	0	0	0	1
AGTC/GACT	0	1	0	0	0	0	0	0	0	0	0	0	0	1
GAAC/GTTC	0	1	0	0	0	0	0	0	0	0	0	0	0	1
GATC/GATC	0	1	0	0	0	0	0	0	0	0	0	0	0	1
GCGT/ACGC	0	1	0	0	0	0	0	0	0	0	0	0	0	1
GCTC/GAGC	0	1	0	0	0	0	0	0	0	0	0	0	0	1
GCTG/CAGC	0	1	0	0	0	0	0	0	0	0	0	0	0	1
GGGT/ACCC	0	1	0	0	0	0	0	0	0	0	0	0	0	1
GTGG/CCAC	0	1	0	0	0	0	0	0	0	0	0	0	0	1
TAAG/CTTA	0	1	0	0	0	0	0	0	0	0	0	0	0	1
TACC/GGTA	0	0	1	0	0	0	0	0	0	0	0	0	0	1
TCCA/TGGA	0	0	0	1	0	0	0	0	0	0	0	0	0	1
TCGG/CCGA	0	1	0	0	0	0	0	0	0	0	0	0	0	1
TCTG/CAGA	0	1	0	0	0	0	0	0	0	0	0	0	0	1
TGAC/GTCA	0	1	0	0	0	0	0	0	0	0	0	0	0	1
TGGT/ACCA	0	1	0	0	0	0	0	0	0	0	0	0	0	1
AAGC/GCTT	0	1	0	0	0	0	0	0	0	0	0	0	0	1
TTAC/GTAA	0	0	0	1	0	0	0	0	0	0	0	0	0	1
AAAAT/ATTTT	0	19	7	0	0	0	0	0	0	0	0	0	0	26
TAAAA/TTTTA	0	15	5	1	0	0	0	0	0	0	0	0	0	21
AAAAG/CTTTT	0	15	2	0	0	0	0	0	0	0	0	1	0	18
TTTTC/GAAAA	0	12	3	0	0	0	0	0	0	0	0	0	0	15
AATAA/TTATT	0	9	2	0	0	0	0	0	0	0	0	0	0	11
GTTTT/AAAAC	0	10	0	0	1	0	0	0	0	0	0	0	0	11
TCTTT/AAAGA	0	8	2	0	0	0	0	0	0	0	0	0	0	10
TTTAT/ATAAA	0	6	1	2	0	0	0	0	0	0	0	0	0	9
AAATA/TATTT	0	5	2	0	0	0	1	0	0	0	0	0	0	8
AGAAG/CTTCT	0	3	4	0	0	0	0	0	0	0	0	0	0	7
AGAGA/TCTCT	0	4	3	0	0	0	0	0	0	0	0	0	0	7
TTTCT/AGAAA	0	6	0	0	0	0	0	0	0	0	0	0	0	6
CTCTC/GAGAG	0	4	1	0	0	0	0	0	0	0	0	0	0	5
CTCTT/AAGAG	0	4	0	0	1	0	0	0	0	0	0	0	0	5
TATAT/ATATA	0	3	1	0	1	0	0	0	0	0	0	0	0	5
TTTTG/CAAAA	0	5	0	0	0	0	0	0	0	0	0	0	0	5
TTTAA/TTAAA	0	3	0	1	0	0	0	0	0	0	0	0	0	4
TTCTT/AAGAA	0	3	1	0	0	0	0	0	0	0	0	0	0	4
ACAAA/TTTGT	0	3	0	0	0	0	0	0	0	0	0	0	0	3
GAGAA/TTCTC	0	2	1	0	0	0	0	0	0	0	0	0	0	3
TAATA/TATTA	0	3	0	0	0	0	0	0	0	0	0	0	0	3
TCTCC/GGAGA	0	2	1	0	0	0	0	0	0	0	0	0	0	3
AATTT/AAATT	0	2	0	0	0	0	0	0	0	0	0	0	0	2
AGAGG/CCTCT	0	1	0	1	0	0	0	0	0	0	0	0	0	2
ATATG/CATAT	0	1	1	0	0	0	0	0	0	0	0	0	0	2
CTTCA/TGAAG	0	2	0	0	0	0	0	0	0	0	0	0	0	2
GAAGA/TCTTC	0	0	2	0	0	0	0	0	0	0	0	0	0	2
TAAAT/ATTTA	0	1	0	1	0	0	0	0	0	0	0	0	0	2
TATAA/TTATA	0	2	0	0	0	0	0	0	0	0	0	0	0	2
TGATG/CATCA	0	1	1	0	0	0	0	0	0	0	0	0	0	2
TGATT/AATCA	0	2	0	0	0	0	0	0	0	0	0	0	0	2
TGTTT/AAACA	0	2	0	0	0	0	0	0	0	0	0	0	0	2
TTGGG/CCCAA	0	0	2	0	0	0	0	0	0	0	0	0	0	2
AAATC/GATTT	0	0	0	1	0	0	0	0	0	0	0	0	0	1
AACCC/GGGTT	0	1	0	0	0	0	0	0	0	0	0	0	0	1
AACCG/CGGTT	0	0	1	0	0	0	0	0	0	0	0	0	0	1
AAGGA/TCCTT	0	0	1	0	0	0	0	0	0	0	0	0	0	1
AATAC/GTATT	0	1	0	0	0	0	0	0	0	0	0	0	0	1
AATTC/GAATT	0	1	0	0	0	0	0	0	0	0	0	0	0	1
ACCAA/TTGGT	0	1	0	0	0	0	0	0	0	0	0	0	0	1
AGCCG/CGGCT	0	0	1	0	0	0	0	0	0	0	0	0	0	1
AGCTT/AAGCT	0	1	0	0	0	0	0	0	0	0	0	0	0	1
AGTTG/CAACT	0	0	1	0	0	0	0	0	0	0	0	0	0	1
ATAAC/GTTAT	0	1	0	0	0	0	0	0	0	0	0	0	0	1
ATAAT/ATTAT	0	0	0	1	0	0	0	0	0	0	0	0	0	1
ATCCA/TGGAT	0	1	0	0	0	0	0	0	0	0	0	0	0	1
ATGAT/ATCAT	0	1	0	0	0	0	0	0	0	0	0	0	0	1
ATTAA/TTAAT	0	1	0	0	0	0	0	0	0	0	0	0	0	1
ATATT/AATAT	0	0	0	1	0	0	0	0	0	0	0	0	0	1
ATTTG/CAAAT	0	1	0	0	0	0	0	0	0	0	0	0	0	1
CACAC/GTGTG	0	1	0	0	0	0	0	0	0	0	0	0	0	1
CACTT/AAGTG	0	1	0	0	0	0	0	0	0	0	0	0	0	1
CCAAG/CTTGG	0	1	0	0	0	0	0	0	0	0	0	0	0	1
CCACA/TGTGG	0	0	1	0	0	0	0	0	0	0	0	0	0	1
CCAGA/TCTGG	0	1	0	0	0	0	0	0	0	0	0	0	0	1
CCATC/GATGG	0	1	0	0	0	0	0	0	0	0	0	0	0	1
CCGAA/TTCGG	0	1	0	0	0	0	0	0	0	0	0	0	0	1
CCTAA/TTAGG	0	0	1	0	0	0	0	0	0	0	0	0	0	1
CGGGC/GCCCG	0	1	0	0	0	0	0	0	0	0	0	0	0	1
CTCCA/TGGAG	0	0	1	0	0	0	0	0	0	0	0	0	0	1
CTCCC/GGGAG	0	1	0	0	0	0	0	0	0	0	0	0	0	1
CTCCT/AGGAG	0	1	0	0	0	0	0	0	0	0	0	0	0	1
CTTTC/GAAAG	0	1	0	0	0	0	0	0	0	0	0	0	0	1
CCGAC/GTCGG	0	1	0	0	0	0	0	0	0	0	0	0	0	1
CCGGC/GCCGG	0	1	0	0	0	0	0	0	0	0	0	0	0	1
GACCC/GGGTC	0	1	0	0	0	0	0	0	0	0	0	0	0	1
GAGGG/CCCTC	0	1	0	0	0	0	0	0	0	0	0	0	0	1
GATGA/TCATC	0	1	0	0	0	0	0	0	0	0	0	0	0	1
GCCAG/CTGGC	0	1	0	0	0	0	0	0	0	0	0	0	0	1
GATGT/ACATC	0	1	0	0	0	0	0	0	0	0	0	0	0	1
GGGAA/TTCCC	0	1	0	0	0	0	0	0	0	0	0	0	0	1
GGTTT/AAACC	0	1	0	0	0	0	0	0	0	0	0	0	0	1
GTAAA/TTTAC	0	1	0	0	0	0	0	0	0	0	0	0	0	1
GTGAT/ATCAC	0	0	1	0	0	0	0	0	0	0	0	0	0	1
GTTGG/CCAAC	0	1	0	0	0	0	0	0	0	0	0	0	0	1
GTTGT/ACAAC	0	0	0	1	0	0	0	0	0	0	0	0	0	1
TAATC/GATTA	0	1	0	0	0	0	0	0	0	0	0	0	0	1
TCATA/TATGA	0	0	1	0	0	0	0	0	0	0	0	0	0	1
TCCAC/GTGGA	0	0	1	0	0	0	0	0	0	0	0	0	0	1
TCCCG/CGGGA	0	1	0	0	0	0	0	0	0	0	0	0	0	1
TCGGG/CCCGA	0	0	1	0	0	0	0	0	0	0	0	0	0	1
TCTCA/TGAGA	0	0	1	0	0	0	0	0	0	0	0	0	0	1
TCTTG/CAAGA	0	1	0	0	0	0	0	0	0	0	0	0	0	1
TGCAC/GTGCA	0	0	1	0	0	0	0	0	0	0	0	0	0	1
TGGTC/GACCA	0	1	0	0	0	0	0	0	0	0	0	0	0	1
TGTAT/ATACA	0	1	0	0	0	0	0	0	0	0	0	0	0	1
TTGCT/AGCAA	0	1	0	0	0	0	0	0	0	0	0	0	0	1
TTGTG/CACAA	0	1	0	0	0	0	0	0	0	0	0	0	0	1
TTGTT/AACAA	0	1	0	0	0	0	0	0	0	0	0	0	0	1
TTTCC/GGAAA	0	1	0	0	0	0	0	0	0	0	0	0	0	1
TTAGC/GCTAA	0	0	1	0	0	0	0	0	0	0	0	0	0	1
TTTCTT/AAGAAA	0	5	0	1	0	0	0	0	0	0	0	0	0	6
AGAAAA/TTTTCT	0	3	1	1	1	0	0	0	0	0	0	0	0	6
TCTCTG/CAGAGA	0	1	2	2	0	0	0	0	0	0	0	0	0	5
TTTTTA/TAAAAA	0	4	1	0	0	0	0	0	0	0	0	0	0	5
TTTTTG/CAAAAA	0	3	2	0	0	0	0	0	0	0	0	0	0	5
AAAAAC/GTTTTT	0	1	1	1	0	0	1	0	0	0	0	0	0	4
ACATAT/ATATGT	0	1	0	2	1	0	0	0	0	0	0	0	0	4
CCTCCA/TGGAGG	0	4	0	0	0	0	0	0	0	0	0	0	0	4
AAAATA/TATTTT	0	2	1	0	0	0	0	0	0	0	0	0	0	3
AATAAA/TTTATT	0	2	1	0	0	0	0	0	0	0	0	0	0	3
CAAAAT/ATTTTG	0	3	0	0	0	0	0	0	0	0	0	0	0	3
CTCCTT/AAGGAG	0	3	0	0	0	0	0	0	0	0	0	0	0	3
AAAAGA/TCTTTT	0	2	0	0	0	0	0	0	0	0	0	0	0	2
AAAGAA/TTCTTT	0	2	0	0	0	0	0	0	0	0	0	0	0	2
AAATAA/TTATTT	0	2	0	0	0	0	0	0	0	0	0	0	0	2
AATCCC/GGGATT	0	2	0	0	0	0	0	0	0	0	0	0	0	2
AGAGGG/CCCTCT	0	1	0	1	0	0	0	0	0	0	0	0	0	2
ATCAAA/TTTGAT	0	1	1	0	0	0	0	0	0	0	0	0	0	2
ATCCAA/TTGGAT	0	1	1	0	0	0	0	0	0	0	0	0	0	2
CAAAAC/GTTTTG	0	1	1	0	0	0	0	0	0	0	0	0	0	2
CAACAC/GTGTTG	0	1	1	0	0	0	0	0	0	0	0	0	0	2
CATCAC/GTGATG	0	0	1	1	0	0	0	0	0	0	0	0	0	2
CCCAAT/ATTGGG	0	2	0	0	0	0	0	0	0	0	0	0	0	2
CTATTA/TAATAG	0	0	0	0	0	0	1	0	1	0	0	0	0	2
CTCTCC/GGAGAG	0	1	1	0	0	0	0	0	0	0	0	0	0	2
CTTCTC/GAGAAG	0	1	0	1	0	0	0	0	0	0	0	0	0	2
GAGGGA/TCCCTC	0	2	0	0	0	0	0	0	0	0	0	0	0	2
GATTGG/CCAATC	0	0	0	2	0	0	0	0	0	0	0	0	0	2
GGAGGT/ACCTCC	0	2	0	0	0	0	0	0	0	0	0	0	0	2
GGGTCG/CGACCC	0	1	1	0	0	0	0	0	0	0	0	0	0	2
GGTGGA/TCCACC	0	1	1	0	0	0	0	0	0	0	0	0	0	2
TCCAAA/TTTGGA	0	1	1	0	0	0	0	0	0	0	0	0	0	2
TGATGG/CCATCA	0	2	0	0	0	0	0	0	0	0	0	0	0	2
TGTATA/TATACA	0	1	1	0	0	0	0	0	0	0	0	0	0	2
TGTGGG/CCCACA	0	2	0	0	0	0	0	0	0	0	0	0	0	2
TTAATT/AATTAA	0	1	1	0	0	0	0	0	0	0	0	0	0	2
TTCAAC/GTTGAA	0	2	0	0	0	0	0	0	0	0	0	0	0	2
TTTAAT/ATTAAA	0	1	0	0	1	0	0	0	0	0	0	0	0	2
TTTGAG/CTCAAA	0	2	0	0	0	0	0	0	0	0	0	0	0	2
AAAATT/AATTTT	0	0	0	0	1	0	0	0	0	0	0	0	0	1
AAAGAG/CTCTTT	0	1	0	0	0	0	0	0	0	0	0	0	0	1
AAATCC/GGATTT	0	0	1	0	0	0	0	0	0	0	0	0	0	1
AACAAA/TTTGTT	0	1	0	0	0	0	0	0	0	0	0	0	0	1
AACACA/TGTGTT	0	0	0	1	0	0	0	0	0	0	0	0	0	1
AACATA/TATGTT	0	0	1	0	0	0	0	0	0	0	0	0	0	1
AACCAA/TTGGTT	0	0	1	0	0	0	0	0	0	0	0	0	0	1
AACTCA/TGAGTT	0	1	0	0	0	0	0	0	0	0	0	0	0	1
AAGCAC/GTGCTT	0	1	0	0	0	0	0	0	0	0	0	0	0	1
AAGGTT/AACCTT	0	1	0	0	0	0	0	0	0	0	0	0	0	1
AATAAC/GTTATT	0	0	0	0	0	0	0	0	1	0	0	0	0	1
AATATT/AATATT	0	1	0	0	0	0	0	0	0	0	0	0	0	1
AATTGT/ACAATT	0	0	0	1	0	0	0	0	0	0	0	0	0	1
AATTTC/GAAATT	0	1	0	0	0	0	0	0	0	0	0	0	0	1
ACAAAT/ATTTGT	0	1	0	0	0	0	0	0	0	0	0	0	0	1
ACAAGC/GCTTGT	0	0	0	1	0	0	0	0	0	0	0	0	0	1
ACCAGC/GCTGGT	0	0	1	0	0	0	0	0	0	0	0	0	0	1
ACCCAA/TTGGGT	0	1	0	0	0	0	0	0	0	0	0	0	0	1
ACCTCA/TGAGGT	0	1	0	0	0	0	0	0	0	0	0	0	0	1
ACTATA/TATAGT	0	0	1	0	0	0	0	0	0	0	0	0	0	1
ACTGAA/TTCAGT	0	1	0	0	0	0	0	0	0	0	0	0	0	1
AGAAAG/CTTTCT	0	0	1	0	0	0	0	0	0	0	0	0	0	1
AGAAGG/CCTTCT	0	1	0	0	0	0	0	0	0	0	0	0	0	1
AGAGTG/CACTCT	0	0	1	0	0	0	0	0	0	0	0	0	0	1
AGCCTC/GAGGCT	0	1	0	0	0	0	0	0	0	0	0	0	0	1
AGCTTG/CAAGCT	0	1	0	0	0	0	0	0	0	0	0	0	0	1
AGGAAG/CTTCCT	0	1	0	0	0	0	0	0	0	0	0	0	0	1
AGTAAT/ATTACT	0	0	0	0	0	0	0	0	1	0	0	0	0	1
AGTGAG/CTCACT	0	1	0	0	0	0	0	0	0	0	0	0	0	1
AGTTAC/GTAACT	0	1	0	0	0	0	0	0	0	0	0	0	0	1
ATAAAG/CTTTAT	0	1	0	0	0	0	0	0	0	0	0	0	0	1
ATACAT/ATGTAT	0	0	1	0	0	0	0	0	0	0	0	0	0	1
ATCAAC/GTTGAT	0	1	0	0	0	0	0	0	0	0	0	0	0	1
ATTATC/GATAAT	0	1	0	0	0	0	0	0	0	0	0	0	0	1
CAAGAT/ATCTTG	0	1	0	0	0	0	0	0	0	0	0	0	0	1
CAATTC/GAATTG	0	1	0	0	0	0	0	0	0	0	0	0	0	1
CACACG/CGTGTG	0	1	0	0	0	0	0	0	0	0	0	0	0	1
CACCAT/ATGGTG	0	0	1	0	0	0	0	0	0	0	0	0	0	1
CACCCT/AGGGTG	0	1	0	0	0	0	0	0	0	0	0	0	0	1
CACCTC/GAGGTG	0	1	0	0	0	0	0	0	0	0	0	0	0	1
CACCTT/AAGGTG	0	1	0	0	0	0	0	0	0	0	0	0	0	1
CAGAAC/GTTCTG	0	1	0	0	0	0	0	0	0	0	0	0	0	1
CAGCAA/TTGCTG	0	1	0	0	0	0	0	0	0	0	0	0	0	1
CATCAA/TTGATG	0	1	0	0	0	0	0	0	0	0	0	0	0	1
CCACCT/AGGTGG	0	0	1	0	0	0	0	0	0	0	0	0	0	1
CCAGAC/GTCTGG	0	1	0	0	0	0	0	0	0	0	0	0	0	1
CCCAAC/GTTGGG	0	1	0	0	0	0	0	0	0	0	0	0	0	1
CCCCAT/ATGGGG	0	1	0	0	0	0	0	0	0	0	0	0	0	1
CCCTCC/GGAGGG	0	1	0	0	0	0	0	0	0	0	0	0	0	1
CCTCTA/TAGAGG	0	1	0	0	0	0	0	0	0	0	0	0	0	1
CCTCTC/GAGAGG	0	1	0	0	0	0	0	0	0	0	0	0	0	1
CGGGTT/AACCCG	0	0	0	0	1	0	0	0	0	0	0	0	0	1
CGGTTG/CAACCG	0	1	0	0	0	0	0	0	0	0	0	0	0	1
CGTCCA/TGGACG	0	1	0	0	0	0	0	0	0	0	0	0	0	1
CTAAAC/GTTTAG	0	1	0	0	0	0	0	0	0	0	0	0	0	1
CTCTGT/ACAGAG	0	1	0	0	0	0	0	0	0	0	0	0	0	1
CTCTTC/GAAGAG	0	1	0	0	0	0	0	0	0	0	0	0	0	1
CTGCCA/TGGCAG	0	1	0	0	0	0	0	0	0	0	0	0	0	1
CTGCGA/TCGCAG	0	1	0	0	0	0	0	0	0	0	0	0	0	1
CTTCAT/ATGAAG	0	1	0	0	0	0	0	0	0	0	0	0	0	1
CTTGCT/AGCAAG	0	0	1	0	0	0	0	0	0	0	0	0	0	1
GAAATC/GATTTC	0	1	0	0	0	0	0	0	0	0	0	0	0	1
GAACAA/TTGTTC	0	1	0	0	0	0	0	0	0	0	0	0	0	1
GAATTT/AAATTC	0	1	0	0	0	0	0	0	0	0	0	0	0	1
GAGATG/CATCTC	0	1	0	0	0	0	0	0	0	0	0	0	0	1
GAGCAG/CTGCTC	0	0	0	0	0	1	0	0	0	0	0	0	0	1
GATGAC/GTCATC	0	1	0	0	0	0	0	0	0	0	0	0	0	1
GCATGG/CCATGC	0	1	0	0	0	0	0	0	0	0	0	0	0	1
GCCCAA/TTGGGC	0	0	1	0	0	0	0	0	0	0	0	0	0	1
GCCCCA/TGGGGC	0	1	0	0	0	0	0	0	0	0	0	0	0	1
GCGCCC/GGGCGC	0	1	0	0	0	0	0	0	0	0	0	0	0	1
GGAGAA/TTCTCC	0	1	0	0	0	0	0	0	0	0	0	0	0	1
GGATGG/CCATCC	0	1	0	0	0	0	0	0	0	0	0	0	0	1
GGTGCA/TGCACC	0	1	0	0	0	0	0	0	0	0	0	0	0	1
GGTGTT/AACACC	0	1	0	0	0	0	0	0	0	0	0	0	0	1
GGTTAC/GTAACC	0	1	0	0	0	0	0	0	0	0	0	0	0	1
GTAATT/AATTAC	0	1	0	0	0	0	0	0	0	0	0	0	0	1
GTCAGA/TCTGAC	0	1	0	0	0	0	0	0	0	0	0	0	0	1
GTTGGC/GCCAAC	0	1	0	0	0	0	0	0	0	0	0	0	0	1
GTTTGG/CCAAAC	0	1	0	0	0	0	0	0	0	0	0	0	0	1
GTTTGT/ACAAAC	0	0	1	0	0	0	0	0	0	0	0	0	0	1
GTCGGA/TCCGAC	0	1	0	0	0	0	0	0	0	0	0	0	0	1
GTGTAT/ATACAC	0	0	0	1	0	0	0	0	0	0	0	0	0	1
TACCCA/TGGGTA	0	1	0	0	0	0	0	0	0	0	0	0	0	1
TATATC/GATATA	0	1	0	0	0	0	0	0	0	0	0	0	0	1
TATGTA/TACATA	0	0	1	0	0	0	0	0	0	0	0	0	0	1
TCCCCG/CGGGGA	0	1	0	0	0	0	0	0	0	0	0	0	0	1
TCGACC/GGTCGA	0	0	1	0	0	0	0	0	0	0	0	0	0	1
TCGGTC/GACCGA	0	1	0	0	0	0	0	0	0	0	0	0	0	1
TCTCTA/TAGAGA	0	0	1	0	0	0	0	0	0	0	0	0	0	1
TCTGCT/AGCAGA	0	1	0	0	0	0	0	0	0	0	0	0	0	1
TCTTCA/TGAAGA	0	1	0	0	0	0	0	0	0	0	0	0	0	1
TCTTCG/CGAAGA	0	1	0	0	0	0	0	0	0	0	0	0	0	1
TCTTTC/GAAAGA	0	0	1	0	0	0	0	0	0	0	0	0	0	1
TGAATT/AATTCA	0	1	0	0	0	0	0	0	0	0	0	0	0	1
TGAGGG/CCCTCA	0	1	0	0	0	0	0	0	0	0	0	0	0	1
TGCCTC/GAGGCA	0	1	0	0	0	0	0	0	0	0	0	0	0	1
TGCTGG/CCAGCA	0	0	1	0	0	0	0	0	0	0	0	0	0	1
TGGCGG/CCGCCA	0	1	0	0	0	0	0	0	0	0	0	0	0	1
TGGGTG/CACCCA	0	0	1	0	0	0	0	0	0	0	0	0	0	1
TGGTGC/GCACCA	0	1	0	0	0	0	0	0	0	0	0	0	0	1
TGGTTT/AAACCA	0	0	1	0	0	0	0	0	0	0	0	0	0	1
TTACTG/CAGTAA	0	1	0	0	0	0	0	0	0	0	0	0	0	1
TTCTCT/AGAGAA	0	1	0	0	0	0	0	0	0	0	0	0	0	1
TTGTAT/ATACAA	0	1	0	0	0	0	0	0	0	0	0	0	0	1
TTGTTT/AAACAA	0	0	0	1	0	0	0	0	0	0	0	0	0	1
TTTGTA/TACAAA	0	1	0	0	0	0	0	0	0	0	0	0	0	1
TTTTGA/TCAAAA	0	1	0	0	0	0	0	0	0	0	0	0	0	1
TTTTGT/ACAAAA	0	1	0	0	0	0	0	0	0	0	0	0	0	1
TTTTAT/ATAAAA	0	7	3	2	1	0	0	1	0	0	0	0	0	14
ATTTTT/AAAAAT	0	11	0	0	1	0	0	0	0	0	0	0	0	12
TTTTTC/GAAAAA	0	7	1	0	0	0	0	0	0	0	0	0	0	8
AAAAAG/CTTTTT	0	4	2	1	0	0	0	0	0	0	0	0	0	7
Total	4	7066	13600	8820	6396	4963	40539	23175	16123	11418	8691	6995	20183	167859
