# Supplementary material for: Genome Survey Sequencing for the Characterization of the Genetic Background of Rosa roxburghii Tratt and Leaf Ascorbate Metabolism Genes
Source: PLoS One. 2016 Feb 5;11(2):e0147530. doi: 10.1371/journal.pone.0147530 (PMC4743950; doi:10.1371/journal.pone.0147530)
Supplement: S4 Table — (XLS) [file pone.0147530.s006.xls]

## Sheet: Sheet1
S4 Table Number of genes mapped onto KEGG pathways
pathway			pathway_id	Gene_number
Metabolism	Carbohydrate metabolism	Glycolysis / Gluconeogenesis	ko00010	58
		Citrate cycle (TCA cycle)	ko00020	35
		Pentose phosphate pathway	ko00030	28
		Pentose and glucuronate interconversions	ko00040	40
		Fructose and mannose metabolism	ko00051	34
		Galactose metabolism	ko00052	22
		Ascorbate and aldarate metabolism	ko00053	20
		Pyruvate metabolism	ko00620	41
		Glyoxylate and dicarboxylate metabolism	ko00630	15
		Propanoate metabolism	ko00640	30
		Butanoate metabolism	ko00650	21
		C5-Branched dibasic acid metabolism	ko00660	6
		Starch and sucrose metabolism	ko00500	80
	Energy metabolism	Nitrogen metabolism	ko00910	26
		Sulfur metabolism	ko00920	12
		Oxidative phosphorylation	ko00190	76
		Photosynthesis	ko00195	22
		Carbon fixation in photosynthetic organisms	ko00710	35
		Photosynthesis - antenna proteins	ko00196	11
	Lipid metabolism	Fatty acid biosynthesis	ko00061	17
		Fatty acid elongation in mitochondria	ko00062	1
		Fatty acid metabolism	ko00071	25
		Synthesis and degradation of ketone bodies	ko00072	1
		Steroid biosynthesis	ko00100	18
		Biosynthesis of unsaturated fatty acids	ko01040	16
		Ether lipid metabolism	ko00565	14
		Arachidonic acid metabolism	ko00590	6
		alpha-Linolenic acid metabolism	ko00592	8
		Sphingolipid metabolism	ko00600	12
	Nucleotide metabolism	Purine metabolism	ko00230	69
		Pyrimidine metabolism	ko00240	62
	Amino acid metabolism	Alanine, aspartate and glutamate metabolism	ko00250	24
		Glycine, serine and threonine metabolism	ko00260	22
		Cysteine and methionine metabolism	ko00270	40
		Valine, leucine and isoleucine degradation	ko00280	33
		Valine, leucine and isoleucine biosynthesis	ko00290	30
		Lysine biosynthesis	ko00300	9
		Lysine degradation	ko00310	16
		Arginine and proline metabolism	ko00330	36
		Histidine metabolism	ko00340	8
		Tyrosine metabolism	ko00350	14
		Phenylalanine metabolism	ko00360	44
		Tryptophan metabolism	ko00380	20
		Phenylalanine, tyrosine and tryptophan biosynthesis	ko00400	25
	Metabolism of other amino acids	beta-Alanine metabolism	ko00410	32
		Taurine and hypotaurine metabolism	ko00430	7
		Selenocompound metabolism	ko00450	7
		Cyanoamino acid metabolism	ko00460	17
		Glutathione metabolism	ko00480	45
	Glycan biosynthesis and metabolism	N-Glycan biosynthesis	ko00510	23
		Other glycan degradation	ko00511	7
		Other types of O-glycan biosynthesis	ko00514	2
		Amino sugar and nucleotide sugar metabolism	ko00520	68
	Glycan biosynthesis and metabolism	Glycosaminoglycan degradation	ko00531	6
		Glycerolipid metabolism	ko00561	29
		Inositol phosphate metabolism	ko00562	32
		Glycosylphosphatidylinositol(GPI)-anchor biosynthesis	ko00563	5
		Glycerophospholipid metabolism	ko00564	41
		Glycosphingolipid biosynthesis - globo series	ko00603	7
		Glycosphingolipid biosynthesis - ganglio series	ko00604	2
	Metabolism of cofactors and vitamins	One carbon pool by folate	ko00670	11
		Thiamine metabolism	ko00730	6
		Riboflavin metabolism	ko00740	4
		Vitamin B6 metabolism	ko00750	12
		Nicotinate and nicotinamide metabolism	ko00760	5
		Pantothenate and CoA biosynthesis	ko00770	23
		Biotin metabolism	ko00780	2
		Lipoic acid metabolism	ko00785	3
		Folate biosynthesis	ko00790	4
		Porphyrin and chlorophyll metabolism	ko00860	26
		Ubiquinone and other terpenoid-quinone biosynthesis	ko00130	16
	Metabolism of terpenoids and polyketides	Terpenoid backbone biosynthesis	ko00900	34
		Limonene and pinene degradation	ko00903	9
		Diterpenoid biosynthesis	ko00904	7
		Brassinosteroid biosynthesis	ko00905	3
		Carotenoid biosynthesis	ko00906	19
		Zeatin biosynthesis	ko00908	11
	Biosynthesis of other secondary metabolites	Caffeine metabolism	ko00232	1
		Phenylpropanoid biosynthesis	ko00940	61
		Flavonoid biosynthesis	ko00941	23
		Flavone and flavonol biosynthesis	ko00944	2
		Stilbenoid, diarylheptanoid and gingerol biosynthesis	ko00945	15
		Isoquinoline alkaloid biosynthesis	ko00950	7
		Tropane, piperidine and pyridine alkaloid biosynthesis	ko00960	12
Genetic Information Processing		Spliceosome	ko03040	109
		Ribosome	ko03010	108
		Aminoacyl-tRNA biosynthesis	ko00970	43
		RNA transport	ko03013	102
		Protein processing in endoplasmic reticulum	ko04141	96
		Ubiquitin mediated proteolysis	ko04120	65
		Ribosome biogenesis in eukaryotes	ko03008	59
		mRNA surveillance pathway	ko03015	59
		RNA degradation	ko03018	40
		Proteasome	ko03050	38
		Nucleotide excision repair	ko03420	33
		Protein export	ko03060	31
		Basal transcription factors	ko03022	29
		DNA replication	ko03030	28
		Homologous recombination	ko03440	21
		Mismatch repair	ko03430	25
		RNA polymerase	ko03020	17
		Base excision repair	ko03410	14
		SNARE interactions in vesicular transport	ko04130	12
		Sulfur relay system	ko04122	7
		Non-homologous end-joining	ko03450	5
Environmental Information Processing		Plant hormone signal transduction	ko04075	113
		Phosphatidylinositol signaling system	ko04070	26
		ABC transporters	ko02010	8
Cellular processes		Endocytosis	ko04144	50
		Phagosome	ko04145	42
		Peroxisome	ko04146	34
		Regulation of autophagy	ko04140	9
Organismal Systems		Circadian rhythm - mammal	ko04710	14
		Circadian rhythm - plant	ko04712	11
		Natural killer cell mediated cytotoxicity	ko04650	10
		Plant-pathogen interaction	ko04626	89
