# Supplementary material for: Genome Survey Sequencing for the Characterization of the Genetic Background of Rosa roxburghii Tratt and Leaf Ascorbate Metabolism Genes
Source: PLoS One. 2016 Feb 5;11(2):e0147530. doi: 10.1371/journal.pone.0147530 (PMC4743950; doi:10.1371/journal.pone.0147530)
Supplement: S5 Table — (XLS) [file pone.0147530.s007.xls]

## Sheet: Sheet1
S5 Table Genes involved in the ascorbate metabolism
Enzymes	EC number	Number of genes	Gene ID	Pathway	Main substrate	Main product
GME	EC:5.1.3.18 5.1.3.-	1	Roxburghii013562-TA	L-galactose synthesis	GDP-alpha-D-mannose	GDP-beta-L-galactose
GGP	EC:2.7.7.69	1	Roxburghii021760-TA	L-galactose synthesis	GDP-beta-L-galactose	beta-L-galactose 1-phosphate
GPP	EC:3.1.3.25 3.1.3.93	1	Roxburghii007418-TA	L-galactose synthesis	beta-L-galactose 1-phosphate	L-galactose
GDH	EC:1.1.1.316	1	Roxburghii012479-TA	L-galactose synthesis	L-galactose	L-galactono-1,4-lactone
GLDH	EC:1.3.2.3	1	Roxburghii012337-TA	L-galactose synthesis	L-galactono-1,4-lactone	L-ascorbate
MIOX	EC:1.13.99.1	3	Roxburghii002764-TA; Roxburghii016536-TA; Roxburghii016678-TA	myo-inositol synthesis	myo-inositol	D-glucuronate
GUR	EC:1.1.1.365	1	Roxburghii012921-TA	D-galacturonate synthesis	L-galactonate	D-galacturonate
AAO	EC:1.10.3.3	1	Roxburghii002218-TA	degradation	L-ascorbate	monodehydroascorbate
APX	EC:1.11.1.11	4	Roxburghii008076-TA; Roxburghii015197-TA; Roxburghii016587-TA; Roxburghii018922-TA	degradation	L-ascorbate, monodehydroascorbate	L-ascorbate, dehydroascorbate, monodehydroascorbate
DHAR	EC:1.8.5.1	1	Roxburghii013431-TA	recycling	dehydroascorbate	L-ascorbate
MDHAR	EC:1.6.5.4	2	Roxburghii008246-TA; Roxburghii018888-TA	recycling	monodehydroascorbate	L-ascorbate
